# Supplementary material
Source: PubMed Central journal article supplement (PMC2655533)
Supplement: supp_191_7_2237__1.pdf [file supp_191_7_2237__1.pdf]

1 **Supplementary Table 1. Primers.**

| 2  | <b>PCR product</b>      | <b>Primer name</b> | <b>Sequence 5' to 3' <sup>a</sup></b>                                      |
|----|-------------------------|--------------------|----------------------------------------------------------------------------|
| 3  | <i>cwlJ1</i> truncation | 352                | <u>GGGGACAAGTTTGTACAAAAAAGCAGGCT</u> A <sup>a</sup> AAAGAGAGGTGACACATAATGG |
| 4  |                         | 353                | <u>GGGGACCACTTTGTACAAGAAAGCTGGGT</u> CCATAAGGCAAAATTTGCAGGCC               |
| 5  | <i>cwlJ2</i> truncation | 348                | <u>GGGACAAGTTTGTACAAAAAAGCAGGCT</u> CAGAAAGGTGGTATCACTATGCC                |
| 6  |                         | 349                | <u>GGGGACCACTTTGTACAAGAAAGCTGGGT</u> CGAGCACGTTGATAAAAAATATCCG             |
| 7  | <i>sleB</i> truncation  | 350                | <u>GGGGACAAGTTTGTACAAAAAAGCAGGCT</u> AAGGAGGGAAATTTATGCC                   |
| 8  |                         | 351                | <u>GGGGACCACTTTGTACAAGAAAGCTGGGT</u> CCATTTGGAACATTTGTCCC                  |
| 9  | <i>cwlJ1</i> entire ORF | 359                | CGCGCGGCGGCTATGGTTTCTTAGACGGTAG                                            |
| 10 |                         | 362                | CGCG <b><i>GATCC</i></b> GTACCGAGTGAGCTACCGCGCTC                           |
| 11 | <i>cwlJ2</i> entire ORF | 363                | CGCGCGGCGGCGGAGGAGGAAAATGCATATG                                            |
| 12 |                         | 366                | CGCG <b><i>GATCC</i></b> GGTTCCAATCTAATTCTTGAAACGC                         |
| 13 | <i>sleB</i> entire ORF  | 288                | CGCGCGGCGGCGCTCGTCTTCTGGAACGACAC                                           |
| 14 |                         | 372                | CGCCTGCAGTTCAAAACAAGATGTTGCAC                                              |
| 15 | pBKJ236::Δ <i>cwlJ1</i> | 360                | <b>GCCCGCGCGG</b> CCAACGCCATTATGTGTCACCTCTC                                |
| 16 |                         | 361                | <b>GCCCGCGCGG</b> CGTATATTAAGGATTGATAATGAGGAGGG                            |
| 17 | pBKJ236::Δ <i>cwlJ2</i> | 364                | <b>GCCCGCGCGG</b> CCTCACGGTAGTAAAATTTGGAACGC                               |
| 18 |                         | 365                | <b>GCCCGCGCGG</b> CAAGGGGCATAGTGATAACCACC                                  |
| 19 | pBKJ236::Δ <i>sleB</i>  | 289                | <b>GCCCGCGCGG</b> CACCTCCCTGCTATTTTAAAAATAGCTT                             |
| 20 |                         | 290                | <b>GCGAGGTGCCGCGCGG</b> GCAAGATCGGGAAACATATTTTC                            |

21 <sup>a</sup> *att* sites for the Gateway system are underlined, *NotI* sites are underlined and italicized, *Bam*HI sites are italicized and in bold, *Pst*I sites are italicized, and *Bgl*II sites are in bold.
